# Supplementary material for: Simultaneous single-cell phenotype analysis of hepatocellular carcinoma CTCs using a SERS-aptamer based microfluidic chip
Source: Royal Society of Chemistry journal article supplement (doi:10.1039/d1lc00516b), 2021-01-01
Supplement: d1lc00516b1.pdf [file d1lc00516b1.pdf]

## Supporting information for

# Simultaneous single-cell phenotype analysis of hepatocellular carcinoma CTCs using SERS-aptamer based microfluidic chip

Rongke Gao,<sup>\*, ab</sup> Changbiao Zhan,<sup>a</sup> Chunyu Wu,<sup>a</sup> Yang Lu,<sup>b</sup> Baoqiang Cao,<sup>c</sup> Jing Huang,<sup>d</sup> Feng Wang,<sup>e</sup> Liandong Yu<sup>\*, b</sup>

<sup>a</sup> State Key Laboratory of Advanced Display Technology, School of Instrument Science and Optoelectronic Engineering, Hefei University of Technology, Hefei 230009, China

<sup>b</sup> College of Control Science and Engineering, China University of Petroleum (East China), Qingdao 266580, China

<sup>c</sup> Department of Hepatobiliary Pancreatic Surgery, Anhui No.2 Provincial People's Hospital, Hefei 230041, China

<sup>d</sup> Hefei University of Technology Hospital, Hefei 230009, China

<sup>e</sup> School of Food and Biological Engineering, Hefei University of Technology, Hefei, 230009, China

**\* Address for correspondence:**

**Rongke Gao**

Telephone: +86-13023091659, E-mail address: rkgao@upc.edu.cn

**Liandong Yu**

E-mail address: liandongyu@upc.edu.cn

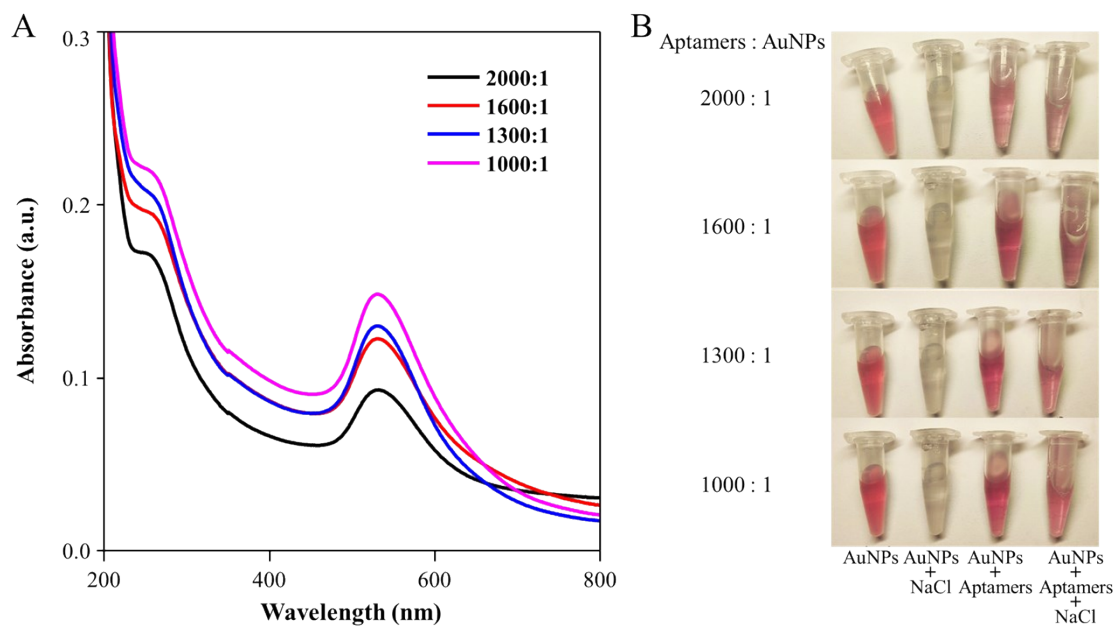

**Figure S1.** The UV-Vis spectra (A) and photographs (B) of various mixing ratios of aptamers and AuNPs.

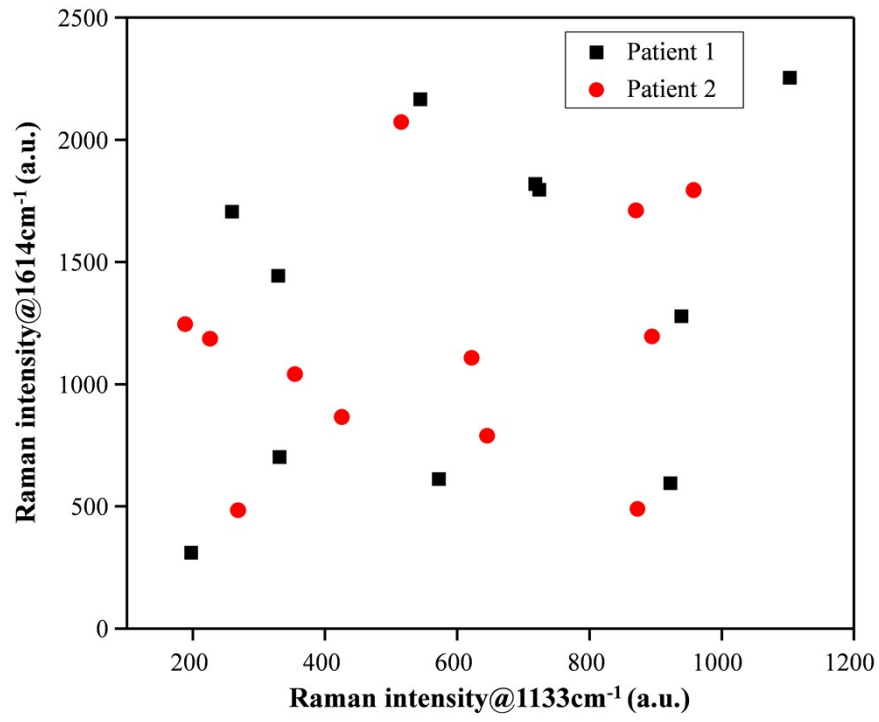

**Figure S2.** The single-cell phenotype analysis of two clinical specimens from HCC patients.

**Table S1.** Micro/nanofluidic technologies for the isolation of CTCs

| Approach                              | Target cell line                    | Efficiency         | Throughput                | Ref.        |
|---------------------------------------|-------------------------------------|--------------------|---------------------------|-------------|
| Size filtration                       | MDA-MB-231,<br>MCF7, SKBR3          | $87 \pm 8\%$       | $1 \mu\text{L min}^{-1}$  | 1           |
|                                       | A549, SK-MES-1,<br>and H446 cells   | 90%                | $0.4 \text{ mL h}^{-1}$   | 2           |
|                                       | SK-HEP-1, HepG2                     | 84%                | $20 \mu\text{L min}^{-1}$ | Our<br>work |
| Aptamer-based<br>isolation            | CEM                                 | $\sim 95\%$        | $600 \text{ nL s}^{-1}$   | 3           |
|                                       | SW480                               | 86.7%-89.4%        | $1 \text{ mL h}^{-1}$     | 4           |
| Antibody-based<br>isolation           | SK-HEP-1, HuH-7                     | 85%, 89%           | $0.6 \text{ mL h}^{-1}$   | 5           |
| Dean flow<br>fractionation            | MCF-7, T24,<br>MDA-MB-231           | $>80\%$            | $0.9 \text{ mL min}^{-1}$ | 6           |
|                                       | MCF-7                               | $91.5\% \pm 0.9\%$ | $2.5 \text{ mL min}^{-1}$ | 7           |
| Immunomagnetic                        | MCF-7, SKBR3,<br>MDA-MB-231,<br>PC3 | $\sim 90\%$        | $>3 \text{ mL h}^{-1}$    | 8           |
| Deterministic lateral<br>displacement | SW480                               | $92.2 \pm 6.4\%$   | $1 \text{ mL h}^{-1}$     | 9           |

## References

1. Y. Zhang, Z. Wang, L. Wu, S. Zong, B. Yun and Y. Cui, *Small*, 2018, **14**, e1704433.
2. T. Huang, C. P. Jia, Y. Jun, W. J. Sun, W. T. Wang, H. L. Zhang, H. Cong, F. X. Jing, H. J. Mao, Q. H. Jin, Z. Zhang, Y. J. Chen, G. Li, G. X. Mao and J. L. Zhao, *Biosens Bioelectron*, 2014, **51**, 213-218.
3. W. Sheng, T. Chen, R. Kamath, X. Xiong, W. Tan and Z. H. Fan, *Anal Chem*, 2012, **84**, 4199-4206.
4. Y. Song, Y. Shi, M. Huang, W. Wang, Y. Wang, J. Cheng, Z. Lei, Z. Zhu and C. Yang, *Angew Chem Int Ed Engl*, 2019, **58**, 2236-2240.
5. L. Zhu, H. Lin, S. Wan, X. Chen, L. Wu, Z. Zhu, Y. Song, B. Hu and C. Yang, *Anal Chem*, 2020, **92**, 15229-15235.
6. M. E. Warkiani, G. Guan, K. B. Luan, W. C. Lee, A. A. Bhagat, P. K. Chaudhuri, D. S. Tan, W. T. Lim, S. C. Lee, P. C. Chen, C. T. Lim and J. Han, *Lab Chip*, 2014, **14**, 128-137.
7. E. Lin, L. Rivera-Baez, S. Fouladdel, H. J. Yoon, S. Guthrie, J. Wiegner, Y. Deol, E. Keller, V. Sahai, D. M. Simeone, M. L. Burness, E. Azizi, M. S. Wicha and S. Nagrath, *Cell Syst*, 2017, **5**, 295-304 e294.
8. J. Autebert, B. Coudert, J. Champ, L. Saias, E. T. Guneri, R. Lebofsky, F. C. Bidard, J. Y. Pierga, F. Farace, S. Descroix, L. Malaquin and J. L. Viovy, *Lab Chip*, 2015, **15**, 2090-2101.
9. M. G. Ahmed, M. F. Abate, Y. Song, Z. Zhu, F. Yan, Y. Xu, X. Wang, Q. Li and C. Yang, *Angew Chem Int Ed Engl*, 2017, **56**, 10681-10685.
